# Supplementary material
Source: publisher figshare collection journal article supplement (https://acs.figshare.com/ndownloader/files/4620190)

## A density functional study of $\alpha$ -Mg(BH<sub>4</sub>)<sub>2</sub>

*Michiel J. van Setten, Gilles A. de Wijs, Maximilian Fichtner, and Geert Brocks*

*Optimized structures:* Tables S1 and S2 give the optimized atomic positions starting from the experimental structures determined by Černý *et al.*<sup>4</sup> and Her *et al.*<sup>5</sup> respectively. All atoms are in the 6a Wyckoff position. The atomic positions of the two sets follow the order used in the original papers, with the first four hydrogen positions forming the tetrahedron around the first boron position etc. The two sets of positions differ by a shift along the c-axis. The Černý positions can be obtained by adding 0.55c to the relaxed Her positions. The Černý magnesium positions 1 to 5 correspond to the Her magnesium positions 4,5,1,2,3. The Černý boron positions 1 to 10 correspond to the Her 5,8,4,9,7,10,6,2,3,1 boron positions. The hydrogen atoms follow the order of the boron atoms in groups of four.

*Crystal structure:* The basic building block of the crystal structure consists of a MgH<sub>8</sub> dodecahedron, where the H atoms are shared in pairs with 4 BH<sub>4</sub> tetrahedra, as shown in figure 2. Each BH<sub>4</sub> tetrahedron forms a bridge to a neighboring MgH<sub>8</sub>, thus generating a tetrahedral network between dodecahedra. The B and H atoms in a BH<sub>4</sub> tetrahedron are bonded by strong sp<sup>3</sup> covalent bonds, implying that the BH<sub>4</sub> tetrahedral geometry is not easily distorted. Indeed all B-H distances are in the range 1.22-1.23 Å. The H-B-H bond angles involving 2 H atoms coordinating the same Mg atom are 115±1° and the remaining tetrahedral H-B-H angles are 107±1°, which means that the BH<sub>4</sub> tetrahedra are only slightly flattened. The Mg and H atoms in a MgH<sub>8</sub> dodecahedron are bonded by dominantly ionic bonds. Although pairwise such bonds are isotropic (they only depend upon the distance between the atoms), the sum of the attractive Mg-H and repulsive H-H Coulomb interactions gives rise to a coordination shell that has a fairly rigid structure.<sup>22,23</sup> Mg-H distances show a spread of ~7%, and the nearest neighbor H-H distances along the edges of a dodecahedron a spread of ~10%, see figure 2. This introduces some flexibility in the MgH<sub>8</sub> geometry, but the basic dodecahedral shape remains.

In summary, the covalent bonding between H and B atoms, and the ionic bonding between H and Mg atoms fix the structure locally. Neighboring dodecahedra are connected by a BH<sub>4</sub> bridge. Because of the tetrahedral shape of the latter, a rotation of 90° between neighboring dodecahedra is introduced by each BH<sub>4</sub> bridge, which is illustrated in figures 3 and S1. Such a constraint makes it difficult to generate a tetrahedral network that has a simple structure. This can be visualized by omitting the H atoms and putting the 4 B atoms surrounding a Mg atom on

the corners of a tetrahedron as in figure S1. These  $\text{MgB}_4$  tetrahedra are distorted and flattened with 2 B-Mg-B angles in the range  $120\text{-}130^\circ$  and the remaining ones in the range  $90\text{-}110^\circ$ . Each B atom that is shared between neighboring  $\text{MgB}_4$  tetrahedra then introduces a rotation around the Mg-B-Mg axis. If the tetrahedra would be perfectly regular, the rotation angle would be  $90^\circ$ , or  $120\text{-}90 = 30^\circ$ . This is stressed by the blue and red lines in figure S1. A simple structure like the  $\text{Cu}_2\text{O}$  structure can also be visualized in terms of linked tetrahedra as shown in figure S2. However, in order to obtain the zigzag chains of tetrahedra, which are vital in the  $\text{Cu}_2\text{O}$  structure, two neighboring tetrahedra then need to be rotated around the Mg-B-Mg axis by  $60^\circ$ , see figure S2. Simple tetrahedral networks involve rotation angles of (multiples of)  $60^\circ$ . The rotation angles in  $\text{Mg}(\text{BH}_4)_2$  are fixed by the dodecahedron/tetrahedron geometry discussed above, and are far from  $60^\circ$ . This introduces considerable strain in the network, which can only be alleviated by spreading it over many sites in a large unit cell.

**Table S1:** Optimized atomic positions starting from the structure determined by Černý *et al.*<sup>4</sup>

|     | x      | y      | z      |
|-----|--------|--------|--------|
| Mg1 | 0.0311 | 0.5124 | 0.0002 |
| Mg2 | 0.3329 | 0.3785 | 0.4514 |
| Mg3 | 0.5234 | 0.4851 | 0.1724 |
| Mg4 | 0.3820 | 0.3329 | 0.0533 |
| Mg5 | 0.0026 | 0.1361 | 0.9190 |
| B1  | 0.6891 | 0.7101 | 0.2988 |
| B2  | 0.8211 | 0.8852 | 0.9383 |
| B3  | 0.5569 | 0.7052 | 0.8031 |
| B4  | 0.0046 | 0.5373 | 0.7755 |
| B5  | 0.0103 | 0.7081 | 0.3723 |
| B6  | 0.4923 | 0.5024 | 0.5027 |
| B7  | 0.8558 | 0.2923 | 0.3663 |
| B8  | 0.0153 | 0.4727 | 0.5633 |
| B9  | 0.2949 | 0.5867 | 0.3393 |
| B10 | 0.1183 | 0.1808 | 0.0667 |
| H1  | 0.5618 | 0.6349 | 0.2867 |
| H2  | 0.7234 | 0.8417 | 0.2952 |
| H3  | 0.7687 | 0.6723 | 0.2826 |
| H4  | 0.7033 | 0.6931 | 0.3310 |
| H5  | 0.7915 | 0.9509 | 0.9149 |
| H6  | 0.9354 | 0.9630 | 0.9557 |
| H7  | 0.8377 | 0.7894 | 0.9229 |
| H8  | 0.7172 | 0.8378 | 0.9600 |
| H9  | 0.5156 | 0.7281 | 0.7741 |
| H10 | 0.6397 | 0.8169 | 0.8211 |
| H11 | 0.6309 | 0.6455 | 0.7962 |

|     |  |        |  |        |  |        |
|-----|--|--------|--|--------|--|--------|
| H12 |  | 0.4430 |  | 0.6292 |  | 0.8211 |
| H13 |  | 0.8834 |  | 0.4662 |  | 0.7601 |
| H14 |  | 0.1099 |  | 0.6167 |  | 0.7557 |
| H15 |  | 0.0313 |  | 0.4440 |  | 0.7884 |
| H16 |  | 0.9924 |  | 0.6191 |  | 0.7976 |
| H17 |  | 0.8902 |  | 0.6785 |  | 0.3859 |
| H18 |  | 0.9894 |  | 0.6943 |  | 0.3395 |
| H19 |  | 0.0486 |  | 0.6251 |  | 0.3863 |
| H20 |  | 0.1127 |  | 0.8369 |  | 0.3771 |
| H21 |  | 0.4819 |  | 0.5718 |  | 0.4769 |
| H22 |  | 0.6272 |  | 0.5561 |  | 0.5079 |
| H23 |  | 0.4392 |  | 0.3676 |  | 0.4975 |
| H24 |  | 0.4230 |  | 0.5136 |  | 0.5284 |
| H25 |  | 0.8197 |  | 0.3700 |  | 0.3486 |
| H26 |  | 0.9901 |  | 0.3470 |  | 0.3719 |
| H27 |  | 0.8192 |  | 0.1782 |  | 0.3487 |
| H28 |  | 0.7964 |  | 0.2743 |  | 0.3958 |
| H29 |  | 0.8919 |  | 0.4184 |  | 0.5776 |
| H30 |  | 0.0108 |  | 0.3820 |  | 0.5412 |
| H31 |  | 0.1188 |  | 0.5006 |  | 0.5840 |
| H32 |  | 0.0401 |  | 0.5926 |  | 0.5506 |
| H33 |  | 0.2221 |  | 0.5482 |  | 0.3673 |
| H34 |  | 0.4237 |  | 0.6733 |  | 0.3486 |
| H35 |  | 0.2579 |  | 0.6545 |  | 0.3181 |
| H36 |  | 0.2766 |  | 0.4755 |  | 0.3231 |
| H37 |  | 0.0530 |  | 0.2111 |  | 0.0901 |
| H38 |  | 0.2142 |  | 0.1642 |  | 0.0821 |
| H39 |  | 0.1657 |  | 0.2842 |  | 0.0448 |
| H40 |  | 0.0397 |  | 0.0658 |  | 0.0494 |

**Table S2:** Optimized atomic positions starting from the structure determined by Her *et al.*<sup>5</sup>

|     |  | x      |  | y      |  | z      |
|-----|--|--------|--|--------|--|--------|
| Mg1 |  | 0.0255 |  | 0.5224 |  | 0.7893 |
| Mg2 |  | 0.6598 |  | 0.0491 |  | 0.8377 |
| Mg3 |  | 0.9927 |  | 0.8661 |  | 0.8705 |
| Mg4 |  | 0.9541 |  | 0.4816 |  | 0.9498 |
| Mg5 |  | 0.9451 |  | 0.3258 |  | 0.0684 |
| B1  |  | 0.8147 |  | 0.9407 |  | 0.8514 |
| B2  |  | 0.0015 |  | 0.4624 |  | 0.0131 |
| B3  |  | 0.6975 |  | 0.2864 |  | 0.9516 |
| B4  |  | 0.6999 |  | 0.1369 |  | 0.0880 |
| B5  |  | 0.9749 |  | 0.6924 |  | 0.9167 |
| B6  |  | 0.8433 |  | 0.2979 |  | 0.8189 |
| B7  |  | 0.0107 |  | 0.7123 |  | 0.8237 |
| B8  |  | 0.1737 |  | 0.1166 |  | 0.8892 |
| B9  |  | 0.5200 |  | 0.9853 |  | 0.8925 |
| B10 |  | 0.9862 |  | 0.4887 |  | 0.1194 |
| H1  |  | 0.8313 |  | 0.0538 |  | 0.8664 |

|     |  |        |  |        |  |        |
|-----|--|--------|--|--------|--|--------|
| H2  |  | 0.9289 |  | 0.9759 |  | 0.8341 |
| H3  |  | 0.7108 |  | 0.8833 |  | 0.8298 |
| H4  |  | 0.7853 |  | 0.8469 |  | 0.8751 |
| H5  |  | 0.1067 |  | 0.4873 |  | 0.0328 |
| H6  |  | 0.8807 |  | 0.4117 |  | 0.0286 |
| H7  |  | 0.9894 |  | 0.3696 |  | 0.9907 |
| H8  |  | 0.0278 |  | 0.5828 |  | 0.0006 |
| H9  |  | 0.5686 |  | 0.2455 |  | 0.9427 |
| H10 |  | 0.7132 |  | 0.1915 |  | 0.9679 |
| H11 |  | 0.7379 |  | 0.3917 |  | 0.9725 |
| H12 |  | 0.7688 |  | 0.3172 |  | 0.9235 |
| H13 |  | 0.6208 |  | 0.1723 |  | 0.1052 |
| H14 |  | 0.7196 |  | 0.1964 |  | 0.0584 |
| H15 |  | 0.6457 |  | 0.0029 |  | 0.0823 |
| H16 |  | 0.8130 |  | 0.1739 |  | 0.1059 |
| H17 |  | 0.9327 |  | 0.5702 |  | 0.9029 |
| H18 |  | 0.9971 |  | 0.6994 |  | 0.9493 |
| H19 |  | 0.8750 |  | 0.7223 |  | 0.9122 |
| H20 |  | 0.0949 |  | 0.7802 |  | 0.9027 |
| H21 |  | 0.8171 |  | 0.1861 |  | 0.8016 |
| H22 |  | 0.7757 |  | 0.2761 |  | 0.8473 |
| H23 |  | 0.8078 |  | 0.3729 |  | 0.8000 |
| H24 |  | 0.9761 |  | 0.3585 |  | 0.8269 |
| H25 |  | 0.1086 |  | 0.8430 |  | 0.8277 |
| H26 |  | 0.9825 |  | 0.6963 |  | 0.7913 |
| H27 |  | 0.8925 |  | 0.6761 |  | 0.8392 |
| H28 |  | 0.0595 |  | 0.6353 |  | 0.8363 |
| H29 |  | 0.0593 |  | 0.0398 |  | 0.9066 |
| H30 |  | 0.2774 |  | 0.1647 |  | 0.9108 |
| H31 |  | 0.1577 |  | 0.2117 |  | 0.8733 |
| H32 |  | 0.2027 |  | 0.0494 |  | 0.8662 |
| H33 |  | 0.5725 |  | 0.1088 |  | 0.8784 |
| H34 |  | 0.6114 |  | 0.9910 |  | 0.9145 |
| H35 |  | 0.4938 |  | 0.8832 |  | 0.8716 |
| H36 |  | 0.4000 |  | 0.9584 |  | 0.9054 |
| H37 |  | 0.9080 |  | 0.4183 |  | 0.1452 |
| H38 |  | 0.0677 |  | 0.6230 |  | 0.1247 |
| H39 |  | 0.9044 |  | 0.4778 |  | 0.0942 |
| H40 |  | 0.0674 |  | 0.4359 |  | 0.1136 |

**Figure S1:** *Top:* A substructure in the  $\text{Mg}(\text{BH}_4)_2$  crystal illustrating  $\text{MgH}_8$  dodecahedra (orange) linked by  $\text{BH}_4$  tetrahedra (green) along the c-axis of the unit cell. Each dodecahedron is linked to other substructures by two more tetrahedra, thus forming a tetrahedral network. *Bottom:* the same structure visualized by omitting the H atoms and putting the 4 B atoms surrounding a Mg atom on the corners of a tetrahedron. The blue and red lines illustrate the rotation between neighboring tetrahedra, which is introduced by the  $\text{BH}_4$  bridges. Going from left to right, the blue and red lines give a rotation out of and into the plane, respectively.

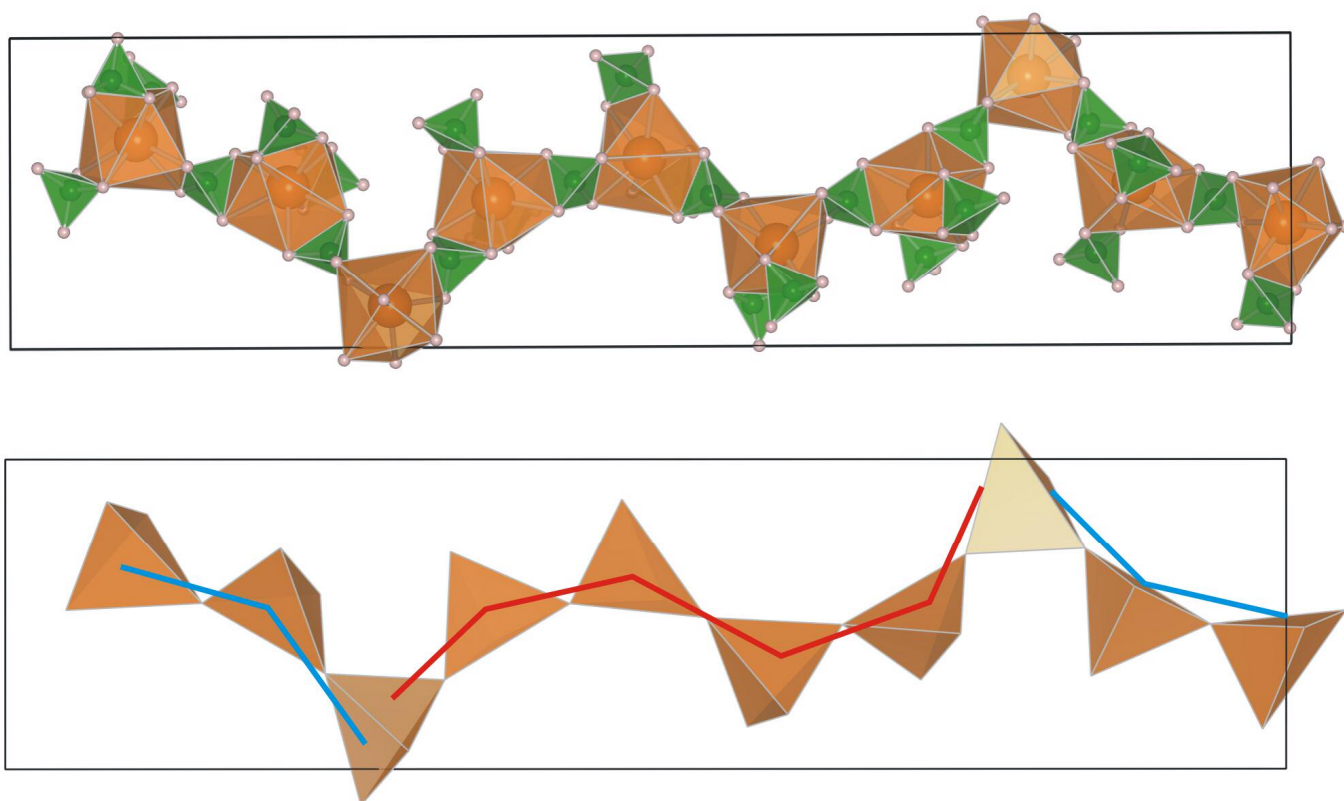

**Figure S2:** A substructure in the  $\text{Cu}_2\text{O}$  structure illustrating the linkage of tetrahedra.

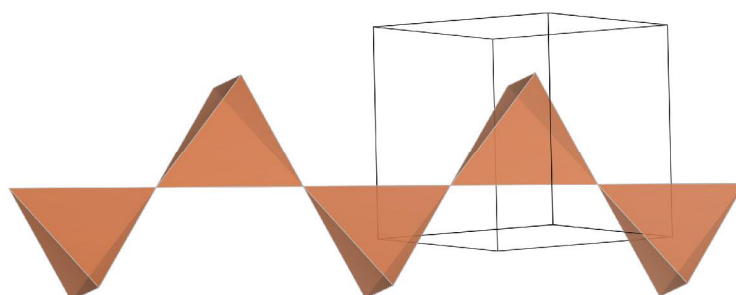

Supplement: Supplementary file 1 [file 4620190]
